# Supplementary material for: Schizont transcriptome variation among clinical isolates and laboratory-adapted clones of the malaria parasite Plasmodium falciparum
Source: PubMed Central journal article supplement (PMC6288915; doi:10.1186/s12864-018-5257-x), 2018-12-10
Supplement: 12864_2018_5257_MOESM1_ESM.pdf [file 12864_2018_5257_MOESM1_ESM.pdf]

## Supplementary Materials and Methods

### Masking of *P. falciparum* genome annotation file for polymorphic regions of genes

The *P. falciparum* v3.1 genome annotation file (accessed May 2015) was masked for regions of polymorphism. To this end, schizont-stage RNA-seq reads for nine clinical isolates from Ghana (INV018, INV020, INV027, INV032, INV051, INV054, INV055, INV056 and INV060) were viewed in Artemis (Rutherford *et al.* 2000, release version 15.1.4), alongside a schizont stage transcriptome of 3D7 taken at 40 hours post invasion. The following parameters were used when viewing the transcriptome data: proper pair reads were shown, unmapped reads were hidden, a read mapping quality of 5 was applied, the coverage view option was selected and within the 'coverage options' section a manual window size of 1 was used. A polymorphic region was then defined as being a region of 100 base pairs or more where the read depth dropped from at least 50 (including other exons of the same gene) to zero in at least one but not all of the ten parasite samples being analysed. Polymorphic regions were not annotated for *var*, *rifin*, *stevor* or non-coding RNA regions, as these were not included in analysis in the current study. Where multiple isolates fulfilled the above criteria, regions were combined across isolates to span the most distal start and end drop-off points. A gene could have more than one distinct polymorphic region called. Using these parameters, each chromosome was visually scanned and manually scored independently by at least two investigators. The chromosome, gene ID and start and end positions of all prospective regions were recorded. All genes containing potential polymorphic regions were subsequently re-examined by one investigator, to confirm they satisfied the above criteria finalise recorded boundaries to produce a final list of 176 regions defined within 139 different genes across 14 chromosomes (Regions Data List A). These regions were masked from exons in the original *P. falciparum* May 2015 (v3.1) genome annotation file.

This first annotation file (Additional file S9: Pf3D7.May2015.NoSplice.LSHTML.gtf) was further corrected for gene ID and base annotations, and masked for other regions of known polymorphism (Miles *et al.* 2016), genes from multi-gene families known to be highly polymorphic, and duplicated genes. For 500 bp windows, the median nucleotide diversity was calculated using data from three *P. falciparum* crosses (3D7 x HB3, HB3 x Dd2 and 7G8 x

GB4, Miles *et al.* 2016). Windows for which the median nucleotide diversity was greater than 0.025 were classed as polymorphic. Twenty-nine regions (within 24 genes and two intergenic regions; Regions Data List B) were masked from the annotation file by manual annotation.

*Var*, *rifin* and *stevor* genes were removed from the genome annotation file, since the hypervariable nature of these large, highly polymorphic multi-gene families limit their usefulness in transcriptomic comparisons between isolates for which curated genome sequences are not available. The *Plasmodium* genome database (PlasmoDB v32) was searched for genes containing “var OR rifin OR stevor”. The resulting list of 357 genes was manually curated to remove any ‘associated’ proteins. The remaining 325 genes were removed from the annotation file using the Galaxy “Filter GTF data by attribute values\_list” tool (<https://usegalaxy.org/>). Finally, the annotation file was manually curated to remove duplicated genes. The final annotation file is Additional file S10 (GTF\_VarRifStev\_filtered out.gtf), which was used to mask the reference genome for subsequent mapping of Illumina short read RNA-seq data.

## Regions Data List A

Regions of polymorphism as determined by examination of RNA-seq read drop-off in schizont-stage clinical isolates.

| Chromosome | Gene ID       | Start Position | End Position | Region Size | CDS Length | Region Proportion of CDS (%) |
|------------|---------------|----------------|--------------|-------------|------------|------------------------------|
| 1          | PF3D7_0102200 | 101791         | 102031       | 240         | 3258       | 7.37                         |
| 1          | PF3D7_0104300 | 190861         | 190991       | 130         | 10500      | 1.24                         |
| 1          | PF3D7_0104300 | 192558         | 192678       | 120         | 10500      | 1.14                         |
| 1          | PF3D7_0108300 | 338178         | 338342       | 164         | 6666       | 2.46                         |
| 1          | PF3D7_0108500 | 349523         | 349704       | 181         | 540        | 33.52                        |
| 1          | PF3D7_0108700 | 353849         | 353993       | 144         | 3459       | 4.16                         |
| 1          | PF3D7_0110600 | 406218         | 406347       | 129         | 5133       | 2.51                         |
| 1          | PF3D7_0110600 | 407033         | 407150       | 117         | 5133       | 2.28                         |
| 1          | PF3D7_0110600 | 408477         | 408610       | 133         | 5133       | 2.59                         |
| 2          | PF3D7_0201900 | 91558          | 91838        | 280         | 7326       | 3.82                         |
| 2          | PF3D7_0203000 | 145207         | 145327       | 120         | 5940       | 2.02                         |
| 2          | PF3D7_0206500 | 264146         | 264347       | 201         | 4311       | 4.66                         |
| 2          | PF3D7_0206800 | 273892         | 274375       | 483         | 819        | 58.97                        |
| 2          | PF3D7_0207100 | 283457         | 283655       | 198         | 5238       | 3.78                         |
| 2          | PF3D7_0207600 | 306134         | 306255       | 121         | 2994       | 4.04                         |
| 2          | PF3D7_0208400 | 344111         | 344253       | 142         | 6033       | 2.35                         |
| 2          | PF3D7_0209500 | 392672         | 392795       | 123         | 1515       | 8.12                         |
| 2          | PF3D7_0212100 | 484222         | 484411       | 189         | 5535       | 3.41                         |
| 2          | PF3D7_0220000 | 797917         | 798601       | 684         | 4677       | 14.62                        |
| 3          | PF3D7_0302200 | 120409         | 120974       | 565         | 4251       | 13.29                        |
| 3          | PF3D7_0302200 | 122291         | 123059       | 768         | 4251       | 18.07                        |
| 3          | PF3D7_0302200 | 123267         | 124497       | 1230        | 4251       | 28.93                        |
| 3          | PF3D7_0302500 | 135415         | 136276       | 861         | 4254       | 20.24                        |
| 3          | PF3D7_0302500 | 136807         | 136951       | 144         | 4254       | 3.39                         |
| 3          | PF3D7_0302500 | 138274         | 138427       | 153         | 4254       | 3.60                         |
| 3          | PF3D7_0302500 | 139173         | 140608       | 1435        | 4254       | 33.73                        |
| 3          | PF3D7_0307700 | 331025         | 331130       | 105         | 5481       | 1.92                         |
| 3          | PF3D7_0310200 | 429678         | 429801       | 123         | 13653      | 0.90                         |
| 3          | PF3D7_0310200 | 430561         | 430708       | 147         | 13653      | 1.08                         |
| 3          | PF3D7_0310200 | 434885         | 435112       | 227         | 13653      | 1.66                         |
| 3          | PF3D7_0310200 | 438562         | 439180       | 618         | 13653      | 4.53                         |
| 3          | PF3D7_0310200 | 439211         | 439391       | 180         | 13653      | 1.32                         |
| 3          | PF3D7_0317300 | 699981         | 700267       | 286         | 10185      | 2.81                         |
| 3          | PF3D7_0317700 | 734635         | 734819       | 184         | 8613       | 2.14                         |
| 3          | PF3D7_0321800 | 913480         | 913708       | 228         | 8121       | 2.81                         |
| 4          | PF3D7_0402200 | 132240         | 132775       | 535         | 6660       | 8.03                         |
| 4          | PF3D7_0402200 | 133404         | 133541       | 137         | 6660       | 2.06                         |
| 4          | PF3D7_0404300 | 235570         | 235673       | 103         | 1896       | 5.43                         |
| 4          | PF3D7_0404600 | 249585         | 249752       | 167         | 12417      | 1.34                         |
| 4          | PF3D7_0406500 | 335938         | 336093       | 155         | 9636       | 1.61                         |

|   |               |         |         |      |       |       |
|---|---------------|---------|---------|------|-------|-------|
| 4 | PF3D7_0406500 | 340679  | 340990  | 311  | 9636  | 3.23  |
| 4 | PF3D7_0406500 | 342457  | 343064  | 607  | 9636  | 6.30  |
| 4 | PF3D7_0407800 | 388337  | 388484  | 147  | 5883  | 2.50  |
| 4 | PF3D7_0410000 | 466383  | 466490  | 107  | 2502  | 4.28  |
| 4 | PF3D7_0419900 | 879351  | 879642  | 291  | 15108 | 1.93  |
| 4 | PF3D7_0419900 | 888000  | 888186  | 186  | 15108 | 1.23  |
| 4 | PF3D7_0420300 | 924730  | 924891  | 161  | 10422 | 1.54  |
| 4 | PF3D7_0423600 | 1064348 | 1064520 | 172  | 4839  | 3.55  |
| 5 | PF3D7_0501300 | 69901   | 70034   | 133  | 1014  | 13.12 |
| 5 | PF3D7_0505100 | 224845  | 224946  | 101  | 8265  | 1.22  |
| 5 | PF3D7_0506500 | 265607  | 267458  | 1851 | 11943 | 15.50 |
| 5 | PF3D7_0506900 | 290687  | 290852  | 165  | 2280  | 7.24  |
| 5 | PF3D7_0507800 | 325306  | 325449  | 143  | 4584  | 3.12  |
| 5 | PF3D7_0508100 | 333352  | 333467  | 115  | 5025  | 2.29  |
| 5 | PF3D7_0508900 | 369309  | 369518  | 209  | 9405  | 2.22  |
| 5 | PF3D7_0508900 | 374515  | 374874  | 359  | 9405  | 3.82  |
| 5 | PF3D7_0508900 | 375083  | 375199  | 116  | 9405  | 1.23  |
| 5 | PF3D7_0509100 | 384874  | 385018  | 144  | 5127  | 2.81  |
| 5 | PF3D7_0510200 | 437621  | 437756  | 135  | 2244  | 6.02  |
| 5 | PF3D7_0513600 | 577399  | 577515  | 116  | 3342  | 3.47  |
| 5 | PF3D7_0515300 | 631846  | 631950  | 104  | 6402  | 1.62  |
| 5 | PF3D7_0516800 | 705232  | 705475  | 243  | 7137  | 3.40  |
| 5 | PF3D7_0517400 | 732758  | 732996  | 238  | 3426  | 6.95  |
| 5 | PF3D7_0527500 | 1144946 | 1145148 | 202  | 1377  | 14.67 |
| 6 | PF3D7_0613800 | 566707  | 566895  | 188  | 12330 | 1.52  |
| 6 | PF3D7_0613800 | 567470  | 567625  | 155  | 12330 | 1.26  |
| 6 | PF3D7_0613800 | 569866  | 569975  | 109  | 12330 | 0.88  |
| 6 | PF3D7_0613800 | 572601  | 572763  | 162  | 12330 | 1.31  |
| 6 | PF3D7_0615400 | 638835  | 638982  | 147  | 8190  | 1.79  |
| 6 | PF3D7_0624600 | 1002215 | 1002352 | 137  | 8160  | 1.68  |
| 6 | PF3D7_0628200 | 1167365 | 1167522 | 157  | 9219  | 1.70  |
| 7 | PF3D7_0704300 | 202029  | 202271  | 242  | 5559  | 4.35  |
| 7 | PF3D7_0707300 | 339803  | 340277  | 474  | 2586  | 18.33 |
| 7 | PF3D7_0710000 | 451547  | 451690  | 143  | 9804  | 1.46  |
| 7 | PF3D7_0710200 | 463817  | 464018  | 201  | 8733  | 2.30  |
| 7 | PF3D7_0710200 | 465104  | 465206  | 102  | 8733  | 1.17  |
| 7 | PF3D7_0710200 | 465646  | 466360  | 714  | 8733  | 8.18  |
| 7 | PF3D7_0710200 | 467869  | 468672  | 803  | 8733  | 9.20  |
| 7 | PF3D7_0710200 | 469853  | 470115  | 262  | 8733  | 3.00  |
| 7 | PF3D7_0710200 | 470363  | 470702  | 339  | 8733  | 3.88  |
| 7 | PF3D7_0716000 | 706083  | 706286  | 203  | 3378  | 6.01  |
| 7 | PF3D7_0723800 | 996606  | 996858  | 252  | 6573  | 3.83  |
| 7 | PF3D7_0724600 | 1031890 | 1031992 | 102  | 6126  | 1.67  |
| 7 | PF3D7_0725100 | 1065916 | 1066189 | 273  | 4731  | 5.77  |
| 7 | PF3D7_0725100 | 1067857 | 1067991 | 134  | 4731  | 2.83  |
| 7 | PF3D7_0727800 | 1177899 | 1178099 | 200  | 5757  | 3.47  |
| 7 | PF3D7_0728600 | 1222709 | 1222970 | 261  | 6489  | 4.02  |

|    |               |         |         |      |       |       |
|----|---------------|---------|---------|------|-------|-------|
| 7  | PF3D7_0730900 | 1329124 | 1329823 | 699  | 6333  | 11.04 |
| 8  | PF3D7_0803500 | 218832  | 219049  | 217  | 4404  | 4.93  |
| 8  | PF3D7_0807100 | 375154  | 375295  | 141  | 3966  | 3.56  |
| 8  | PF3D7_0807100 | 375494  | 375623  | 129  | 3966  | 3.25  |
| 8  | PF3D7_0807600 | 392146  | 392378  | 232  | 4005  | 5.79  |
| 8  | PF3D7_0812100 | 608784  | 608892  | 108  | 7956  | 1.36  |
| 8  | PF3D7_0818900 | 862283  | 862417  | 134  | 2034  | 6.59  |
| 8  | PF3D7_0829000 | 1248451 | 1248597 | 146  | 5724  | 2.55  |
| 8  | PF3D7_0831600 | 1362696 | 1362814 | 118  | 4185  | 2.82  |
| 8  | PF3D7_0831800 | 1374305 | 1374836 | 531  | 918   | 57.84 |
| 9  | PF3D7_0919900 | 816122  | 816242  | 120  | 10146 | 1.18  |
| 9  | PF3D7_0924500 | 996754  | 996894  | 140  | 3897  | 3.59  |
| 9  | PF3D7_0930300 | 1201982 | 1202175 | 193  | 5163  | 3.74  |
| 9  | PF3D7_0930300 | 1202644 | 1202895 | 251  | 5163  | 4.86  |
| 9  | PF3D7_0930300 | 1204005 | 1204121 | 116  | 5163  | 2.25  |
| 9  | PF3D7_0930500 | 1214059 | 1214207 | 148  | 4083  | 3.62  |
| 9  | PF3D7_0935200 | 1370958 | 1371084 | 126  | 3444  | 3.66  |
| 10 | PF3D7_1008100 | 332821  | 332928  | 107  | 11562 | 0.93  |
| 10 | PF3D7_1017600 | 707647  | 707806  | 159  | 2916  | 5.45  |
| 10 | PF3D7_1019100 | 771214  | 771355  | 141  | 5787  | 2.44  |
| 10 | PF3D7_1019700 | 802554  | 802659  | 105  | 3225  | 3.26  |
| 10 | PF3D7_1023900 | 1005560 | 1005677 | 117  | 9987  | 1.17  |
| 10 | PF3D7_1023900 | 1005916 | 1006059 | 143  | 9987  | 1.43  |
| 10 | PF3D7_1033100 | 1326014 | 1326123 | 109  | 4305  | 2.53  |
| 10 | PF3D7_1035100 | 1391759 | 1391942 | 183  | 1686  | 10.85 |
| 10 | PF3D7_1035200 | 1395119 | 1396485 | 1366 | 1758  | 77.70 |
| 10 | PF3D7_1035300 | 1402123 | 1402237 | 114  | 3702  | 3.08  |
| 10 | PF3D7_1035400 | 1404344 | 1404697 | 353  | 1065  | 33.15 |
| 10 | PF3D7_1035500 | 1407521 | 1407785 | 264  | 1116  | 23.66 |
| 10 | PF3D7_1035700 | 1413654 | 1414474 | 820  | 2094  | 39.16 |
| 10 | PF3D7_1035900 | 1424700 | 1424811 | 111  | 1701  | 6.53  |
| 10 | PF3D7_1035900 | 1425131 | 1425381 | 250  | 1701  | 14.70 |
| 11 | PF3D7_1107300 | 310416  | 310518  | 102  | 10005 | 1.02  |
| 11 | PF3D7_1117900 | 681301  | 681406  | 105  | 4416  | 2.38  |
| 11 | PF3D7_1123000 | 898128  | 898231  | 103  | 7404  | 1.39  |
| 11 | PF3D7_1130700 | 1182465 | 1182662 | 197  | 5457  | 3.61  |
| 11 | PF3D7_1131800 | 1228081 | 1228192 | 111  | 4731  | 2.35  |
| 11 | PF3D7_1132400 | 1258613 | 1258740 | 127  | 4386  | 2.90  |
| 11 | PF3D7_1133400 | 1294318 | 1294839 | 521  | 1869  | 27.88 |
| 11 | PF3D7_1136000 | 1407873 | 1408113 | 240  | 10407 | 2.31  |
| 11 | PF3D7_1149000 | 1953727 | 1953833 | 106  | 18282 | 0.58  |
| 11 | PF3D7_1149000 | 1955409 | 1955648 | 239  | 18282 | 1.31  |
| 11 | PF3D7_1149000 | 1958705 | 1958972 | 267  | 18282 | 1.46  |
| 11 | PF3D7_1149000 | 1963139 | 1963294 | 155  | 18282 | 0.85  |
| 11 | PF3D7_1149200 | 1977853 | 1977992 | 139  | 3273  | 4.25  |
| 12 | PF3D7_1209300 | 430302  | 430564  | 262  | 4386  | 5.97  |
| 12 | PF3D7_1211800 | 526944  | 527171  | 227  | 1146  | 19.81 |

|    |               |         |         |      |       |       |
|----|---------------|---------|---------|------|-------|-------|
| 12 | PF3D7_1202600 | 149525  | 149720  | 195  | 6543  | 2.98  |
| 12 | PF3D7_1227200 | 1098835 | 1098948 | 113  | 5901  | 1.91  |
| 12 | PF3D7_1227500 | 1120159 | 1120260 | 101  | 6912  | 1.46  |
| 12 | PF3D7_1228600 | 1160721 | 1160918 | 197  | 2232  | 8.83  |
| 12 | PF3D7_1228800 | 1176357 | 1176819 | 462  | 9630  | 4.80  |
| 12 | PF3D7_1229600 | 1216859 | 1217213 | 354  | 3492  | 10.14 |
| 12 | PF3D7_1235900 | 1499821 | 1499984 | 163  | 3096  | 5.26  |
| 12 | PF3D7_1238500 | 1598381 | 1598516 | 135  | 5439  | 2.48  |
| 12 | PF3D7_1248700 | 1996055 | 1996159 | 104  | 5970  | 1.74  |
| 13 | PF3D7_1329600 | 1259388 | 1259501 | 113  | 906   | 12.47 |
| 13 | PF3D7_1335100 | 1419294 | 1419454 | 160  | 1056  | 15.15 |
| 13 | PF3D7_1335300 | 1431202 | 1438587 | 7385 | 9765  | 75.63 |
| 13 | PF3D7_1335400 | 1441061 | 1448396 | 7335 | 9393  | 78.09 |
| 13 | PF3D7_1337500 | 1515603 | 1515875 | 272  | 10005 | 2.72  |
| 13 | PF3D7_1339700 | 1593564 | 1593835 | 271  | 5811  | 4.66  |
| 13 | PF3D7_1348400 | 1945641 | 1946256 | 615  | 11568 | 5.32  |
| 13 | PF3D7_1356800 | 2260273 | 2260378 | 105  | 12135 | 0.87  |
| 13 | PF3D7_1357000 | 2266094 | 2266806 | 712  | 1332  | 53.45 |
| 13 | PF3D7_1357100 | 2269140 | 2269737 | 597  | 1332  | 44.82 |
| 13 | PF3D7_1362700 | 2513983 | 2514092 | 109  | 6120  | 1.78  |
| 13 | PF3D7_1362700 | 2514345 | 2514619 | 274  | 6120  | 4.48  |
| 13 | PF3D7_1366400 | 2658121 | 2658265 | 144  | 3789  | 3.80  |
| 13 | PF3D7_1367700 | 2696594 | 2696715 | 121  | 4227  | 2.86  |
| 14 | PF3D7_1402800 | 102123  | 102294  | 171  | 4536  | 3.77  |
| 14 | PF3D7_1403100 | 114151  | 114726  | 575  | 5868  | 9.80  |
| 14 | PF3D7_1410300 | 412342  | 412456  | 114  | 13218 | 0.86  |
| 14 | PF3D7_1411000 | 440789  | 440985  | 196  | 6165  | 3.18  |
| 14 | PF3D7_1412400 | 496454  | 496924  | 470  | 9657  | 4.87  |
| 14 | PF3D7_1413700 | 542183  | 542324  | 141  | 3642  | 3.87  |
| 14 | PF3D7_1423800 | 969884  | 970052  | 168  | 4407  | 3.81  |
| 14 | PF3D7_1425400 | 990402  | 990591  | 189  | 3711  | 5.09  |
| 14 | PF3D7_1428900 | 1136859 | 1136979 | 120  | 4338  | 2.77  |
| 14 | PF3D7_1431300 | 1231562 | 1231853 | 291  | 2502  | 11.63 |
| 14 | PF3D7_1439500 | 1609844 | 1609971 | 127  | 3225  | 3.94  |
| 14 | PF3D7_1442900 | 1755336 | 1755542 | 206  | 10155 | 2.03  |
| 14 | PF3D7_1448500 | 1989515 | 1989837 | 322  | 11115 | 2.90  |
| 14 | PF3D7_1452000 | 2135670 | 2135792 | 122  | 6570  | 1.86  |
| 14 | PF3D7_1452400 | 2149153 | 2149356 | 203  | 2703  | 7.51  |
| 14 | PF3D7_1464500 | 2613108 | 2613233 | 125  | 9756  | 1.28  |
| 14 | PF3D7_1468100 | 2791803 | 2791923 | 120  | 7677  | 1.56  |
| 14 | PF3D7_1472200 | 2947686 | 2947858 | 172  | 6756  | 2.55  |
| 14 | PF3D7_1472200 | 2948840 | 2949028 | 188  | 6756  | 2.78  |

Regions Data List B  
**Regions of high nucleotide diversity (> 0.025)**  
**based on Miles *et al.* 2016**

| Gene ID         | Chromosome  | Window start | Window end |
|-----------------|-------------|--------------|------------|
| PF3D7_0104100   | Pf3D7_01_v3 | 180001       | 180500     |
| PF3D7_0113600   | Pf3D7_01_v3 | 513001       | 513500     |
| PF3D7_0113600   | Pf3D7_01_v3 | 514001       | 515000     |
| PF3D7_0113800   | Pf3D7_01_v3 | 530001       | 531500     |
| PF3D7_0207600   | Pf3D7_02_v3 | 306001       | 306500     |
| PF3D7_0221000   | Pf3D7_02_v3 | 848501       | 849000     |
| PF3D7_0302300   | Pf3D7_03_v3 | 129501       | 130500     |
| PF3D7_0401600.2 | Pf3D7_04_v3 | 92501        | 93000      |
| PF3D7_0402200   | Pf3D7_04_v3 | 128001       | 128500     |
| PF3D7_0402200   | Pf3D7_04_v3 | 132001       | 134000     |
| PF3D7_0424400   | Pf3D7_04_v3 | 1101001      | 1102000    |
| PF3D7_0425200   | Pf3D7_04_v3 | 1137001      | 1138000    |
| PF3D7_0505000   | Pf3D7_05_v3 | 216501       | 217000     |
| intergenic      | Pf3D7_07_v3 | 78001        | 78500      |
| PF3D7_0701900   | Pf3D7_07_v3 | 79501        | 80500      |
| PF3D7_0710200   | Pf3D7_07_v3 | 466001       | 466500     |
| PF3D7_0713100   | Pf3D7_07_v3 | 606001       | 606500     |
| PF3D7_0830800   | Pf3D7_08_v3 | 1311001      | 1312500    |
| PF3D7_0831600   | Pf3D7_08_v3 | 1362501      | 1363000    |
| PF3D7_0930300   | Pf3D7_09_v3 | 1202001      | 1202500    |
| PF3D7_0930300   | Pf3D7_09_v3 | 1203001      | 1207000    |
| PF3D7_1035200   | Pf3D7_10_v3 | 1394501      | 1395000    |
| intergenic      | Pf3D7_10_v3 | 1397001      | 1398500    |
| PF3D7_1035700   | Pf3D7_10_v3 | 1413501      | 1414500    |
| PF3D7_1036300   | Pf3D7_10_v3 | 1433001      | 1434500    |
| PF3D7_1301800   | Pf3D7_13_v3 | 106001       | 107000     |
| PF3D7_1422900   | Pf3D7_14_v3 | 922501       | 923000     |
| PF3D7_1475800   | Pf3D7_14_v3 | 3121001      | 3121500    |
| PF3D7_1477600   | Pf3D7_14_v3 | 3193501      | 3194500    |

## References

- Kim D, Langmead B and Salzberg SL. HISAT: a fast spliced aligner with low memory requirements. *Nature Methods* 2015
- Li H, Handsaker B, Wysoker A, Fennell T, Ruan J, Homer N, Marth G, Abecasis G, Durbin R and 1000 Genome Project Data Processing Subgroup. The Sequence alignment/map (SAM) format and SAMtools. *Bioinformatics* 2009
- Rutherford K, Parkhill J, Crook J, Horsnell T, Rice P, Rajandream MA and Barrell B. Artemis: sequence visualization and annotation. *Bioinformatics* 2000
- Broadbent KM, Broadbent JC, Ribacke U, Wirth D, Rinn JL and Sabeti PC. Strand-specific RNA sequencing in *Plasmodium falciparum* malaria identifies developmentally regulated long non-coding RNA and circular RNA. *BMC Genomics* 2015
- Lawrence M, Huber W, Pagès H, Aboyoun P, Carlson M, Gentleman R, Morgan M and Carey V. Software for Computing and Annotating Genomic Ranges. *PLoS Computational Biology*, 2013
- Love MI, Huber W and Anders S. Moderated estimation of fold change and dispersion for RNA-seq data with DESeq2. *Genome Biology* 2014
- Rutherford K, Parkhill J, Crook J, Horsnell T, Rice P, Rajandream MA and Barrell B. Artemis: sequence visualization and annotation. *Bioinformatics* 2000
- Miles A, Iqbal Z, Vauterin P, Pearson R, Campino S, Theron M, Gould K, Mead D, Drury E, O'Brien J, Ruano Rubio V, MacInnis B, Mwangi J, Samarakoon U, Ranford-Cartwright L, Ferdig M, Hayton K, Su X-Z, Wellems T, Rayner J, McVean G, Kwiatkowski D. Indels, structural variation, and recombination drive genomic diversity in *Plasmodium falciparum*. *Genome Research* 2016
