# Supplementary material for: Schizont transcriptome variation among clinical isolates and laboratory-adapted clones of the malaria parasite Plasmodium falciparum
Source: PubMed Central journal article supplement (PMC6288915; doi:10.1186/s12864-018-5257-x), 2018-12-10
Supplement: 12864_2018_5257_MOESM5_ESM.pdf [file 12864_2018_5257_MOESM5_ESM.pdf]

Normalised counts

PF3D7\_0104300

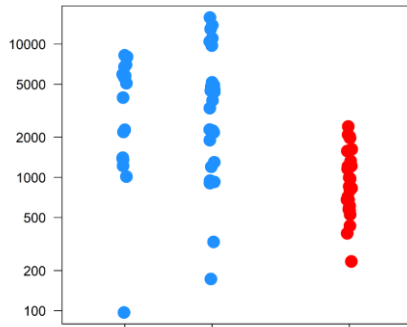

PF3D7\_0410000

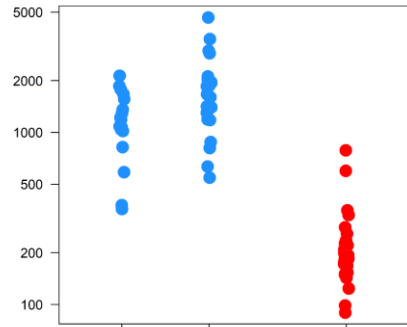

PF3D7\_0420300

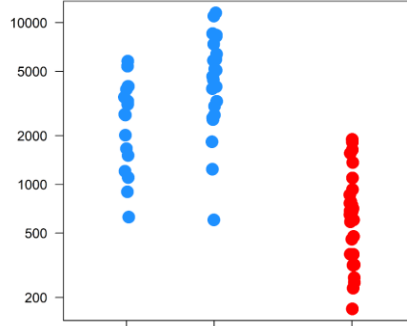

PF3D7\_0422900

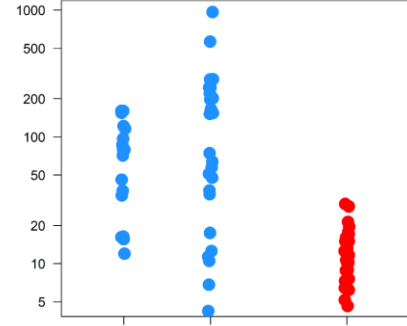

PF3D7\_0501300

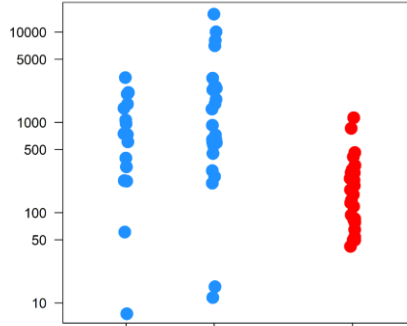

PF3D7\_0522300

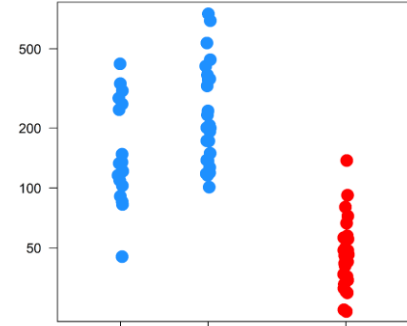

PF3D7\_1030200

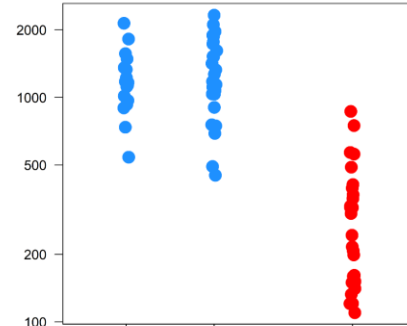

PF3D7\_1327300

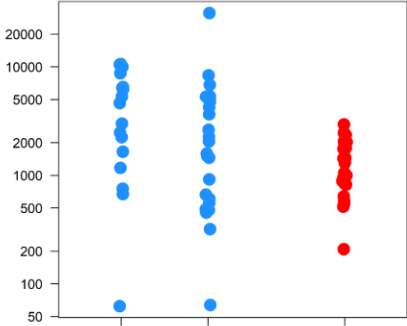

PF3D7\_1036300

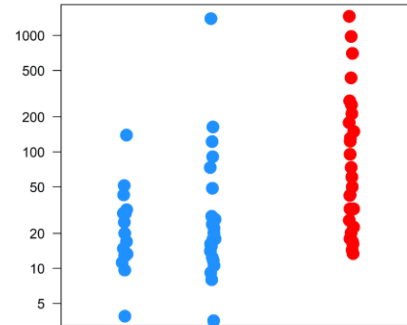

PF3D7\_1302100

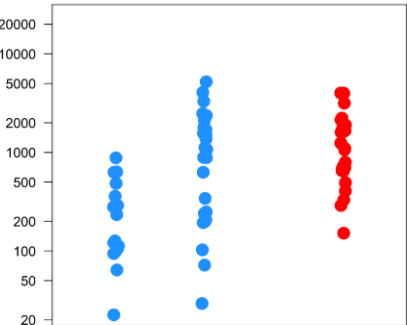

Lab 40h

Lab 48h

Clinical 40h

Lab 40h

Lab 48h

Clinical 40h
