# Supplementary material for: Schizont transcriptome variation among clinical isolates and laboratory-adapted clones of the malaria parasite Plasmodium falciparum
Source: PubMed Central journal article supplement (PMC6288915; doi:10.1186/s12864-018-5257-x), 2018-12-10

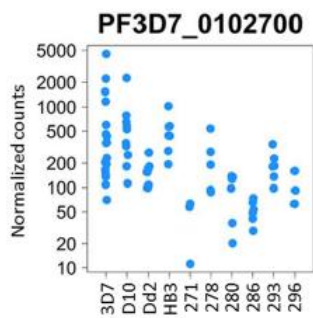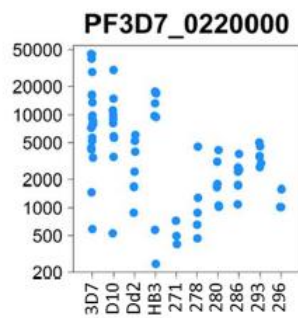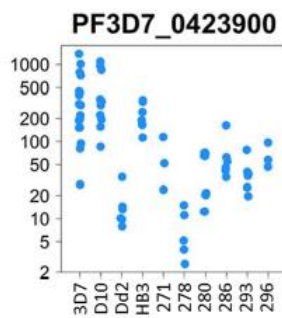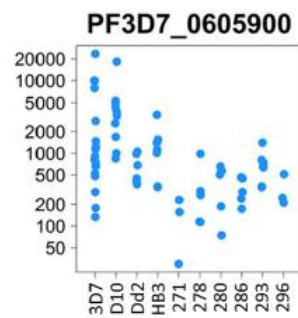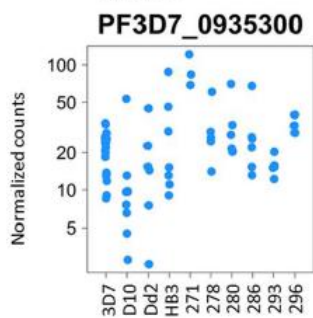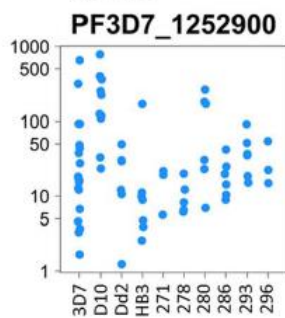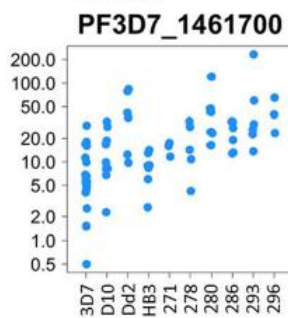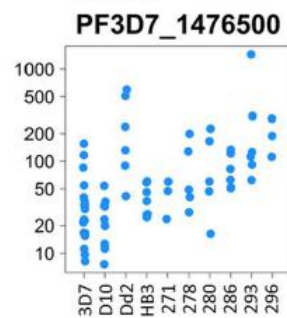

Supplement: 12864_2018_5257_MOESM8_ESM.pdf [file 12864_2018_5257_MOESM8_ESM.pdf]
